# Supplementary material for: A High Docosahexaenoic Acid Diet Alters the Lung Inflammatory Response to Acute Dust Exposure
Source: PubMed Central journal article supplement (PMC7468878; doi:10.3390/nu12082334), 2020-08-04
Supplement: nutrients-12-02334-s001.pdf [file nutrients-12-02334-s001.pdf]

SUPPLEMENTAL DATA

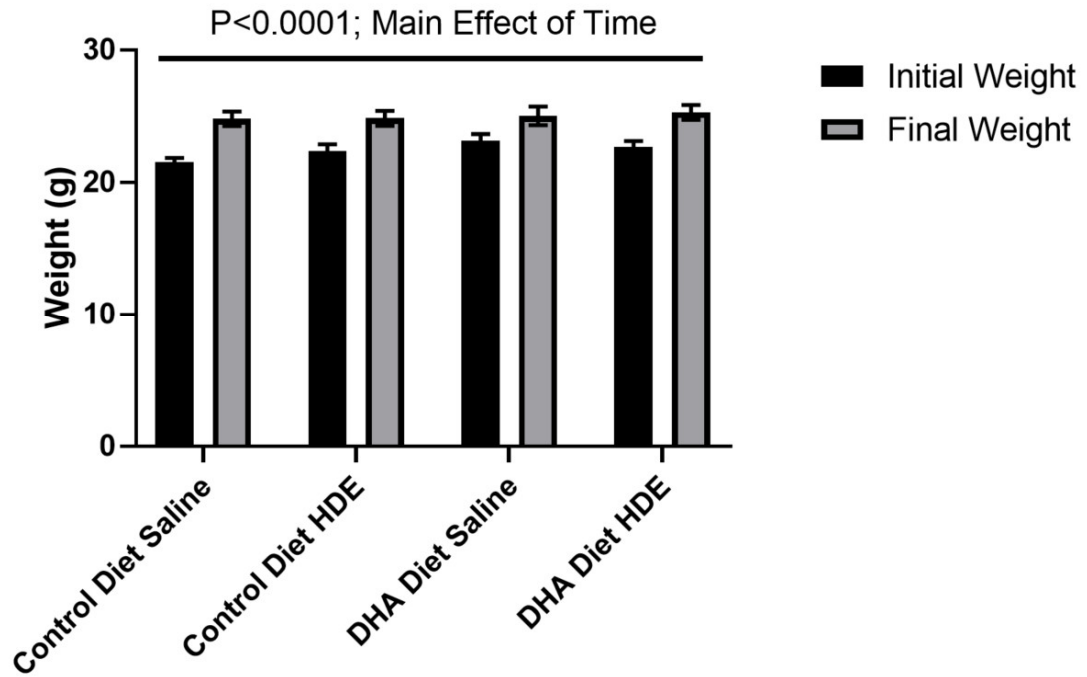

Figure S1. Initial and Final weights of mice fed a control diet or high DHA diet for 4 weeks. A significant main effect of time was identified ( $p < 0.0001$ ), with mice in all experimental groups gaining weight over the 4-week period. There were no significant impacts of diet/HDE treatment on animal weights.
